# Supplementary material
Source: publisher figshare collection journal article supplement (https://tandf.figshare.com/articles/dataset/_/7152668)
Supplement: Supplementary file 1 [file 2]

~~Go straight to content.~~

  
**Health Research Authority**



Is my study research?

 To print your result with title and IRAS Project ID please enter your details below:

Title of your research:

MULTICENTRE UK TANEC AUDIT

IRAS Project ID (if available):

You selected:

- 'No' - Are the participants in your study randomised to different groups?
- 'No' - Does your study protocol demand changing treatment/ patient care from accepted standards for any of the patients involved?
- 'No' - Are your findings going to be generalisable?

**Your study would NOT be considered Research by the NHS.**

You may still need other approvals.

Researchers requiring further advice (e.g. those not confident with the outcome of this tool) should contact their R&D office or sponsor in the first instance, or the **HRA** to discuss your study. If contacting the HRA for advice, do this by sending an outline of the project (maximum one page), summarising its purpose, methodology, type of participant and planned location as well as a copy of this results page and a summary of the aspects of the decision(s) that you need further advice on to the HRA Queries Line at [HRA.Queries@nhs.net](mailto:HRA.Queries@nhs.net).

For more information please visit the [Defining Research](#) leaflet

**Follow this link to start again.**

Print This Page

NOTE: If using Internet Explorer please use browser print function.

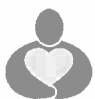

Our Vision  
To provide every patient  
with the care we want  
for those we love the most

Norfolk and Norwich University Hospitals **NHS**

NHS Foundation Trust

→ Audit file.  
JC 12/11/14

Research and Development Office  
Level 3 East  
Norfolk and Norwich University Hospital  
Colney Lane  
Norwich NR4 7UY  
direct dial: 01603 286611  
email: [lisa.chalkley@nnuh.nhs.uk](mailto:lisa.chalkley@nnuh.nhs.uk)

Dr Paul Clarke  
Consultant Neonatologist & Honorary Senior Lecturer of the University of East Anglia  
Norfolk and Norwich University Hospitals NHS Foundation Trust  
Colney Lane  
Norwich  
Norfolk  
NR4 7UY

7<sup>th</sup> November 2014

Dear Dr Clarke

Thank you for your enquiry regarding the multi-centre audit entitled

*"Transfusion Associated Necrotizing Enterocolitis" ('TANEC')".*

I can confirm from the information provided that this project does not meet the criteria for NHS research and does not require formal ethical approval or local NHS permission.

Please do not hesitate to contact me should you require any further information.

Yours sincerely

Lisa Chalkley  
Research Services Manager

RECEIVED  
12 NOV 2014
